# Supplementary material
Source: publisher figshare collection journal article supplement (https://acs.figshare.com/ndownloader/files/3834715)
Supplement: Supplementary file 1 [file 3834715]

Supporting Information for

# Structural Control of Fully Condensed Polysilsesquioxanes: Ladderlike vs. Cage Structured Polyphenylsilsesquioxanes

Seung-Sock Choi,<sup>§</sup> Albert Sung Soo Lee,<sup>§</sup> Seung Sang Hwang, and Kyung-Youl Baek \*

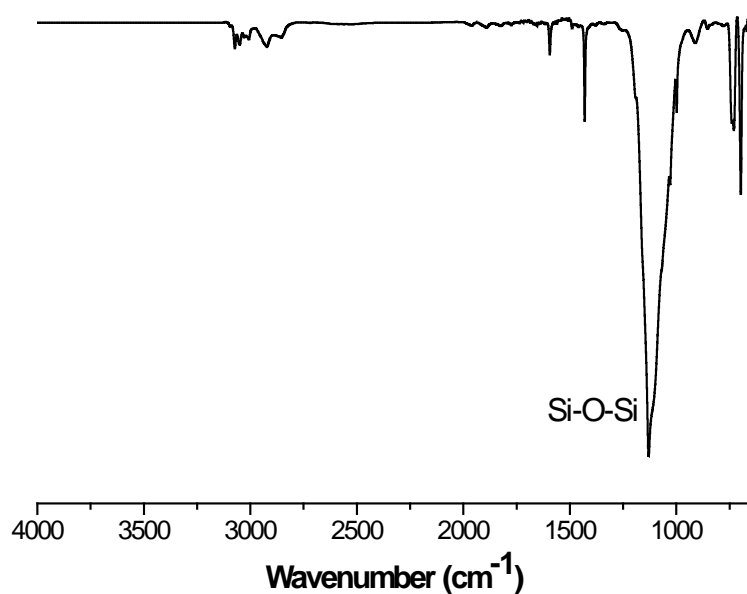

Supporting Figure S1. FT-IR Spectra for T<sub>12</sub>-Phenyl POSS

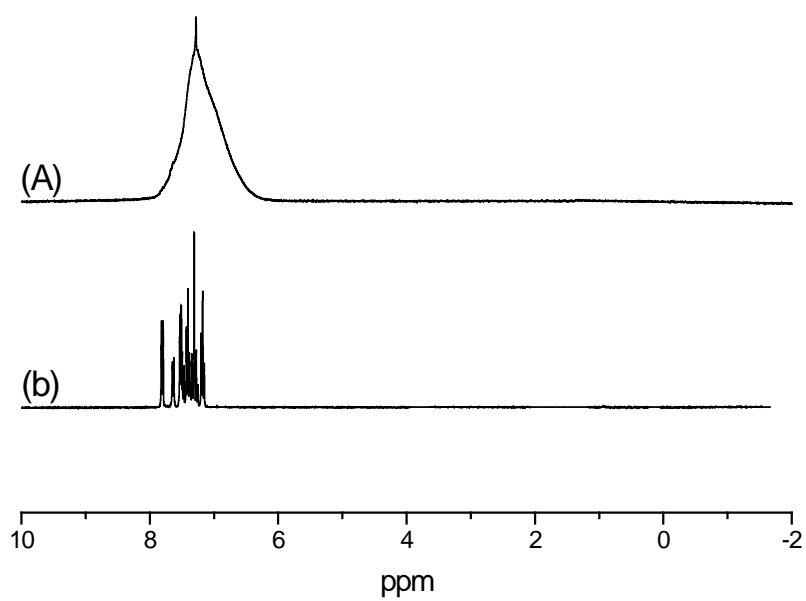

Supporting Figure S2.  $^1\text{H}$  NMR Spectra of (A) LPPSQ and (B)  $\text{T}_{12}$ -Phenyl POSS

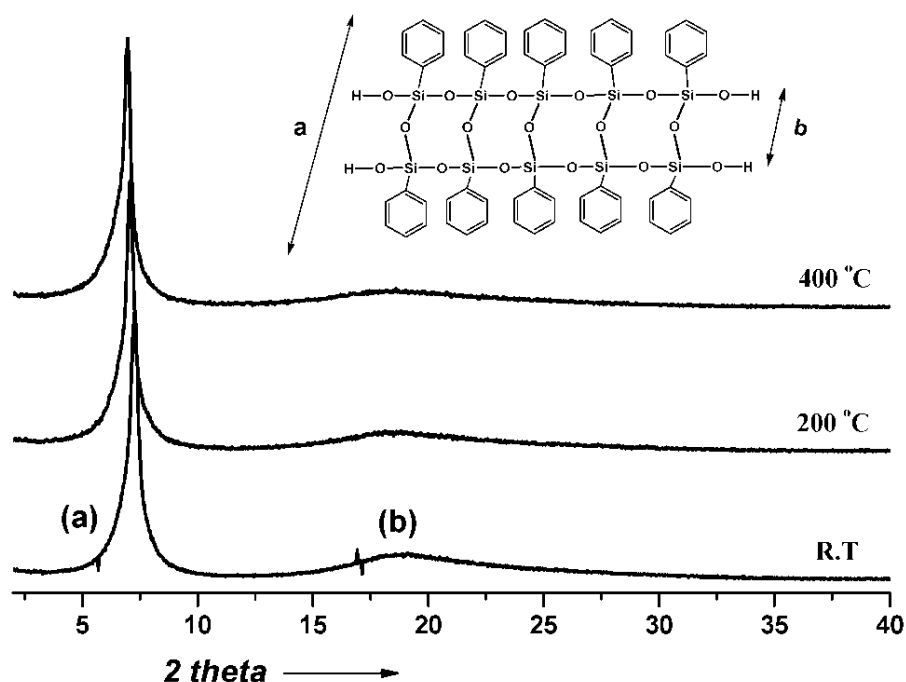

Supporting Figure S3. XRD pattern of LPPSQ due to temperature: periodic chain-to-chain distance (a) and thickness (b).

Supporting Figure S3 shows the X-ray diffraction (XRD) pattern of the obtained LPPSQ. Ladder-structured polysilsesquioxane typically shows two characteristic diffraction peaks in XRD patterns at various temperatures. The first sharp peak at 7.3° originated ( $d_1 = 12.1 \text{ \AA}$ ) from the intramolecular periodic chain-to-chain distance (a) in the ladderlike structured LPPSQ. With the second diffusing peak at 18.8° ( $d_2 = 4.7 \text{ \AA}$ ), a wide range of diffraction angles showed the average thickness (b) of the ladder-structured LPPSQ. In addition, XRD patterns of LPPSQ confirmed that thermal variation from room temperature to high temperature (400 °C) did not significantly alter the structure. This meant that synthetic LPPSQ was stable without thermal decomposition defects such as methoxy or intermediate hydroxyl groups.
